# Supplementary material for: Substrate Specificity within a Family of Outer Membrane Carboxylate Channels
Source: PLOS journal article supplement (doi:10.1371/journal.pbio.1001242), 2012-01-17
Supplement: S11 (10.1371/journal.pbio.1001242.s011) [file journal.pbio.1001242.s011]

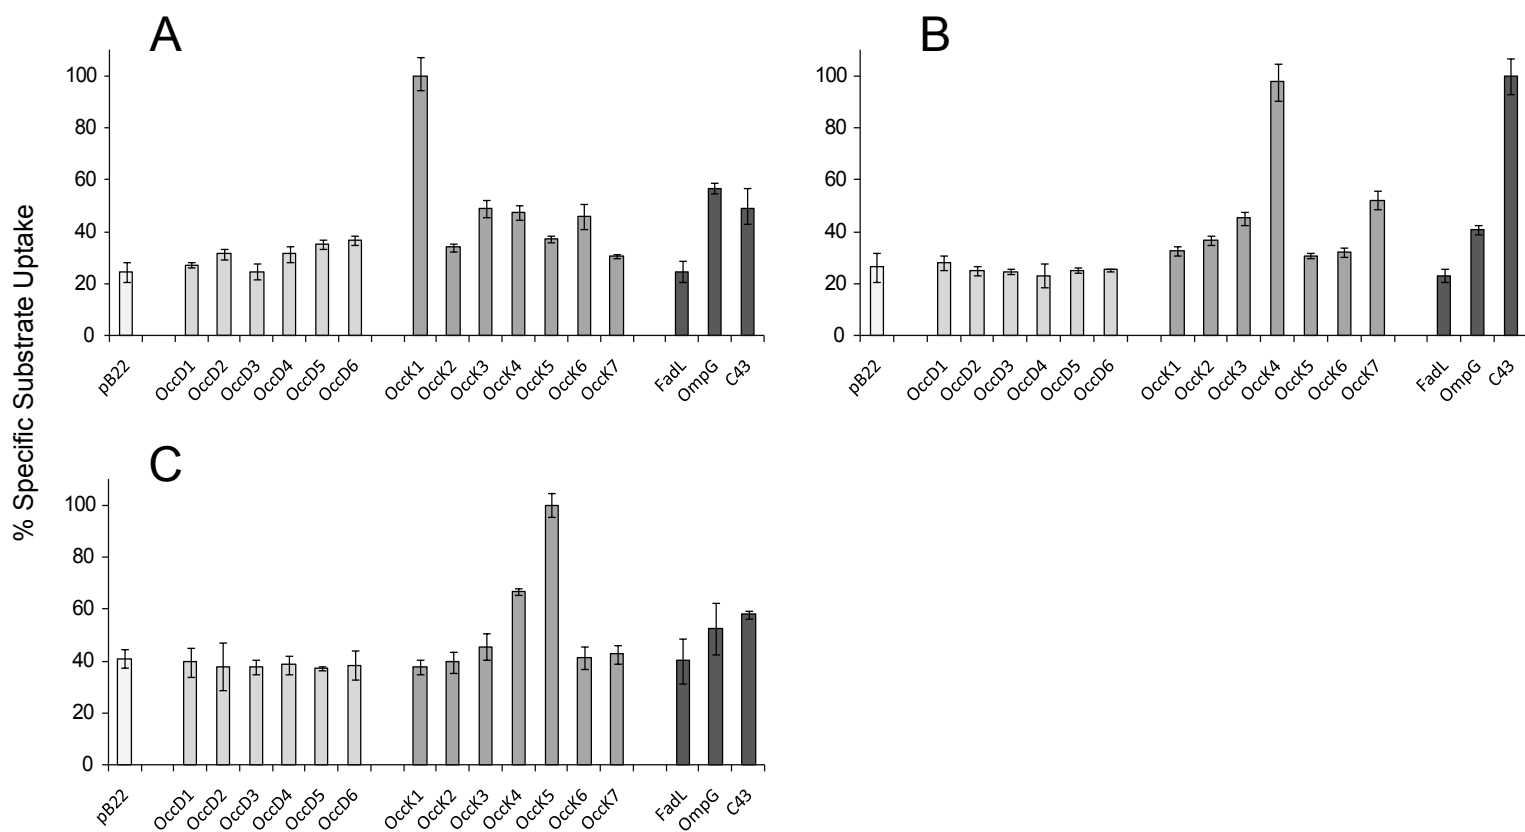

**Figure S11.** Uptake of non-preferred radiolabeled substrates in *E. coli* BI21 omp8 total membrane vesicles, expressing empty plasmid (pB22), Occ channels or *E. coli* OmpG or FadL. Substrates are (A) vanillate (10  $\mu$ M, 45 minutes), (B) phenylacetate (10  $\mu$ M, 45 minutes) and, (C) citrate (10  $\mu$ M, 45 minutes). 100% specific activities correspond to  $27.8 \pm 1.7$  (A),  $7.6 \pm 0.5$  (B) and,  $6.2 \pm 0.6$  (C) pmoles substrate/min/mg protein.
